# Supplementary material
Source: PubMed Central journal article supplement (PMC2890806)
Supplement: 0914506107_pnas.0914506107_SI.pdf [file 0914506107_pnas.0914506107_SI.pdf]

# Supporting Information

Yang et al. 10.1073/pnas.0914506107

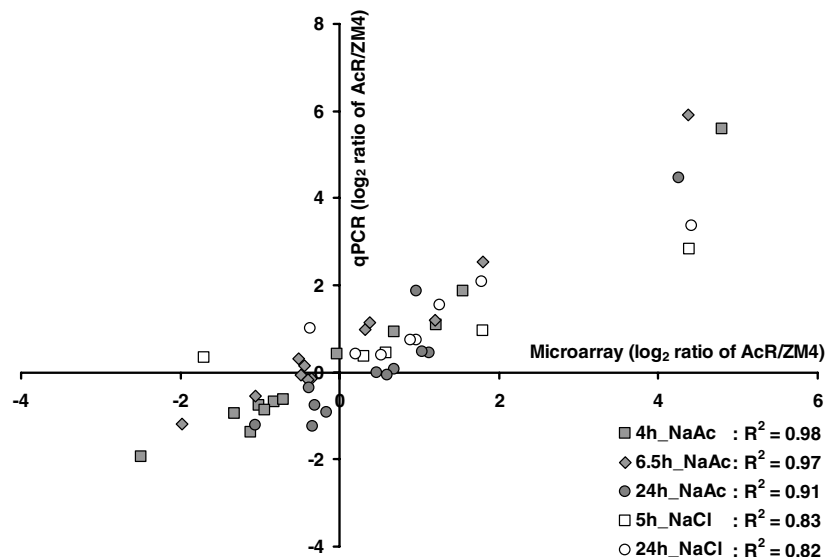

**Fig. S1.** Supplemental method for real-time quantitative RT-PCR (qRT-PCR) analysis. Microarray data were validated using real-time qRT-PCR as described previously (1) except that the BioRad MyiQ2 Two-Color Real-Time PCR Detection System (BioRad Laboratories) and Roche FastStart SYBR Green Master reagent (Roche Applied Science) were used for this experiment. Twelve genes representing different functional categories and a range of gene expression values based on microarray results over different time point were analyzed using qRT-PCR. Primer pairs were designed as described previously (1) and the oligonucleotide sequences are listed in [Table S4](#).

1 Yang S, et al. (2009) Transcriptomic and metabolomic profiling of *Zymomonas mobilis* during aerobic and anaerobic fermentation. *BMC genomics* 10:34.

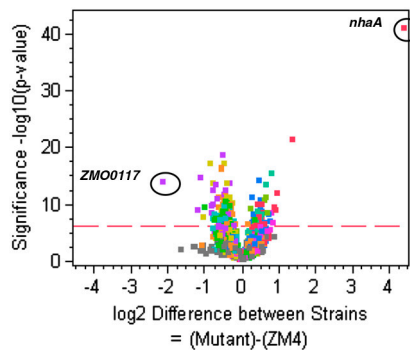

**Fig. S2.** Volcano plot summary of microarray analysis showing all significantly differentially expressed genes between AcR and the ZM4 wild-type strains for all conditions (sodium acetate and sodium chloride in exponential and stationary phase cells). The X axis shows the difference values ( $\log_2$ ) between AcR and ZM4 expression profiles. The Y axis shows statistical significance values ( $-\log_{10}(p\text{-values})$ ) for expression differences. The red dashed line shows the statistical significance cut-off used in this study.



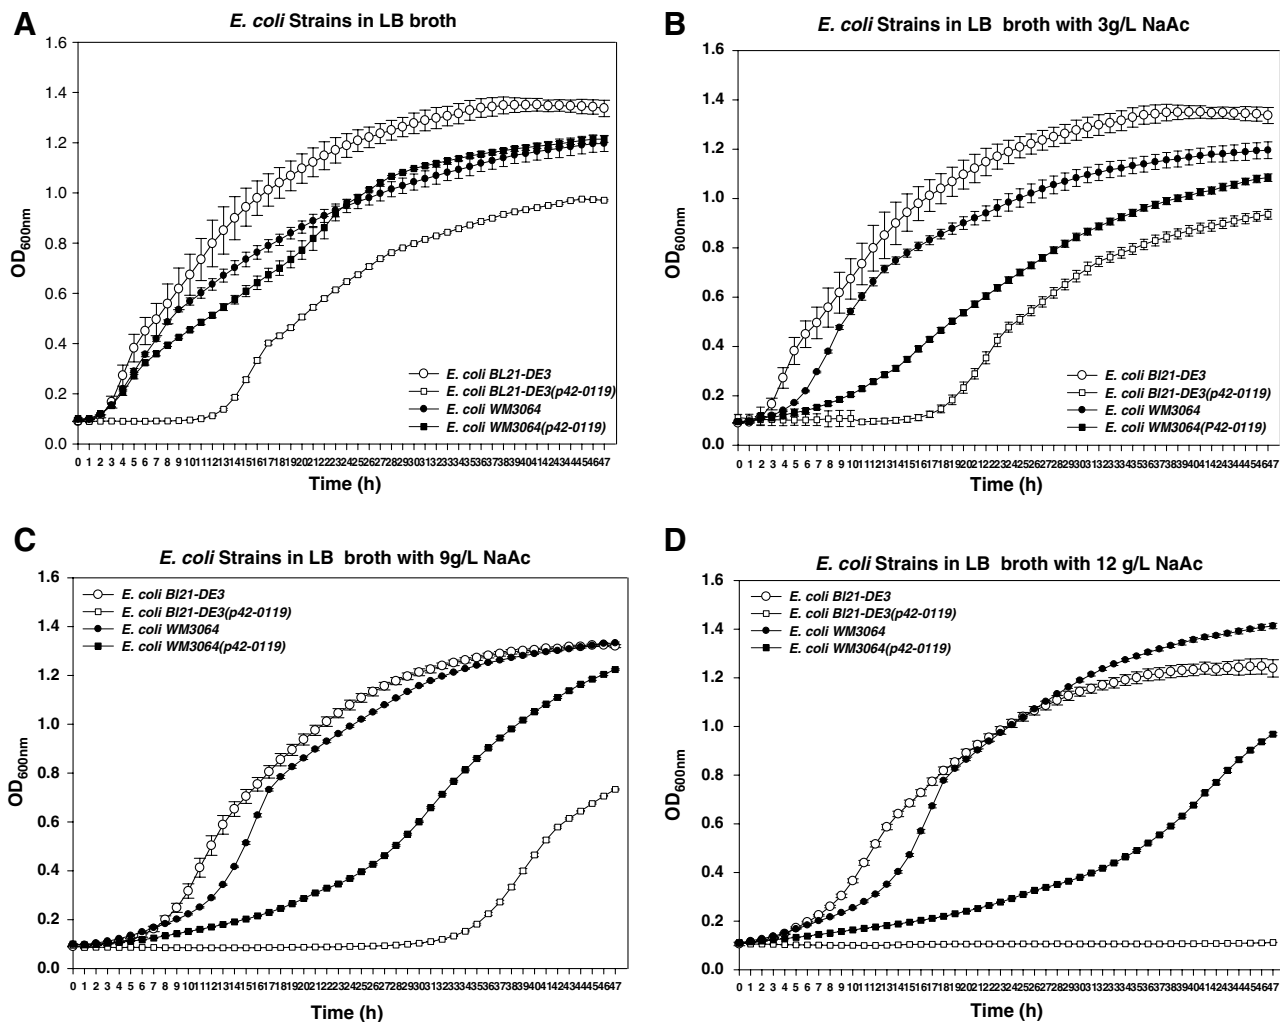

**Fig. S4.** Overexpression of ZM4 *nhaA* in *E. coli* had a negative effect on sodium acetate tolerance. Two *E. coli* strains (WM3064 and BL21-DE3, the latter is used for protein overexpression) were grown in LB overnight, and then 5  $\mu$ L of culture seed was transferred into 250- $\mu$ L LB broth in the Bioscreen plate (Growth Curves USA). The growth differences of different strains were monitored by Bioscreen C (Growth Curves USA) in LB broth, pH 7.0 (A); LB with 3 g/L NaAc, pH 7.0 (B); LB with 6 g/L NaAc, pH 7.0 (C), LB with 12 g/L NaAc, pH 7.0 (D). Strains included in this study were: *E. coli* BL21-DE3 (p42-0119): *E. coli* BL21-DE3 containing a gateway plasmid p42-0119 for *nhaA* (ZMO0119) expression; *E. coli* WM3064 (p42-0119): *E. coli* BL21-DE3 containing a gateway plasmid p42-0119 for *nhaA* (ZMO0119) expression. Duplicates were used for each condition.
